# Supplementary material for: Hive-stored pollen of honey bees: many lines of evidence are consistent with pollen preservation, not nutrient conversion
Source: PubMed Central journal article supplement — Mol Ecol. 2014 Nov 5;23(23):5904–17. doi: 10.1111/mec.12966 (PMC4285803; doi:10.1111/mec.12966), 2014-11-05
Supplement: mec0023-5904-SD1.pdf [file mec0023-5904-SD1.pdf]

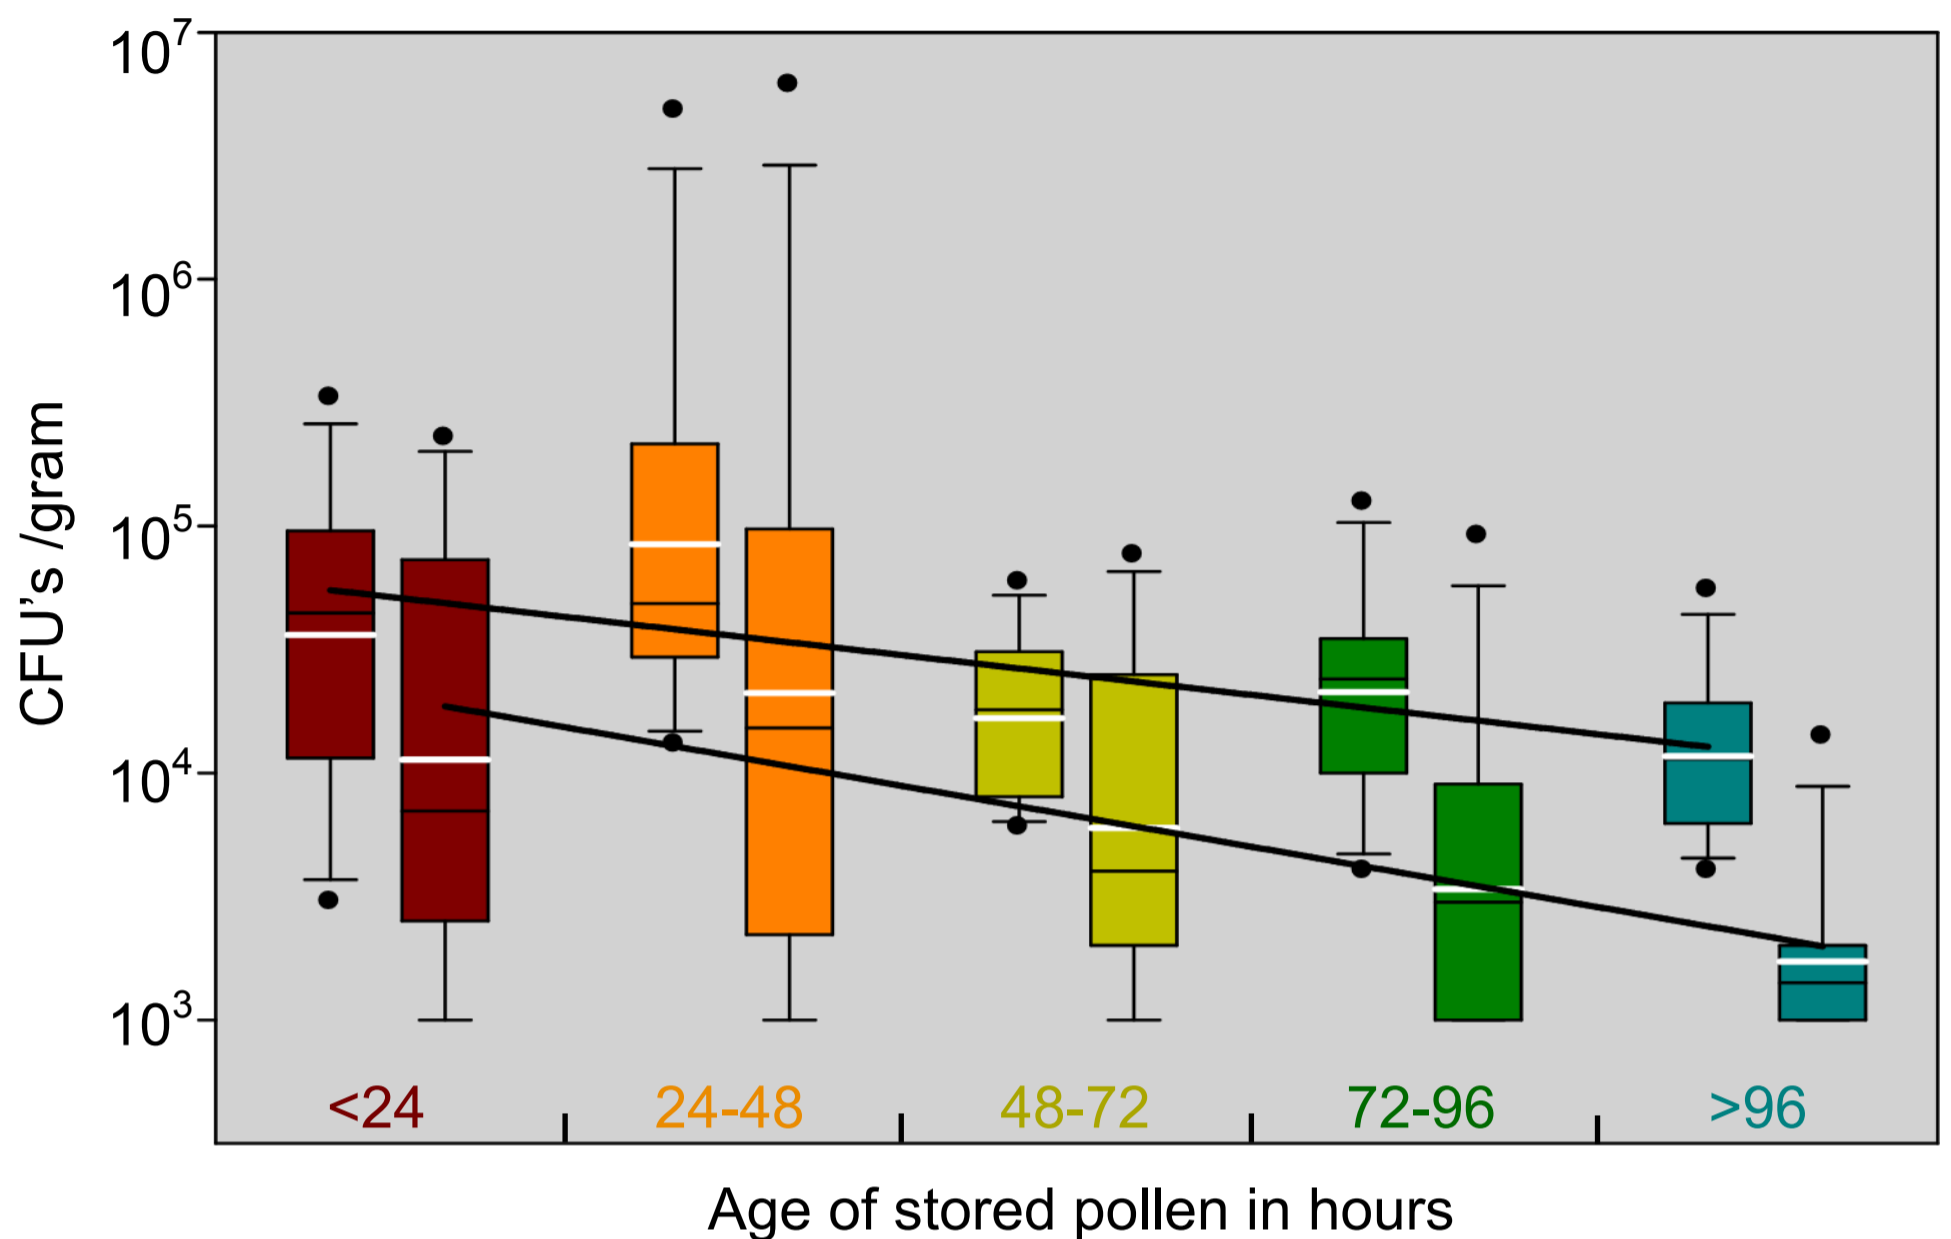

**Figure S1. Colony forming units (CFU's) per gram of pollen stored for 1-5 days within active colonies.** Above each designated age class, the box on the left is standard methods agar (SMA), the box on the right is de Man Rogosa Sharp agar (MRS). Values that compose each stored pollen boxplot ( $n = 12$ ) include average replicate counts from both media types and all plates showing growth above the lowest dilution factor ( $10^{-3}$ ). Results are normalized by common log transformation and partitioned by media type. Two statistical outliers were removed from each media type (see results). The median is black horizontal line within the grey box, and the bold white line represents the mean. Regression analysis revealed a significant negative relationship between bacterial counts and pollen storage time for each media type independently (SMA; Adj Rsqr = 0.14,  $F_{1,57} = 10.5$ ,  $P = 0.002$ , MRS; Adj Rsqr = 0.16,  $F_{1,57} = 12.0$ ,  $P = 0.001$ ).
