# Supplementary material for: Hive-stored pollen of honey bees: many lines of evidence are consistent with pollen preservation, not nutrient conversion
Source: PubMed Central journal article supplement — Mol Ecol. 2014 Nov 5;23(23):5904–17. doi: 10.1111/mec.12966 (PMC4285803; doi:10.1111/mec.12966), 2014-11-05
Supplement: mec0023-5904-SD2.pdf [file mec0023-5904-SD2.pdf]

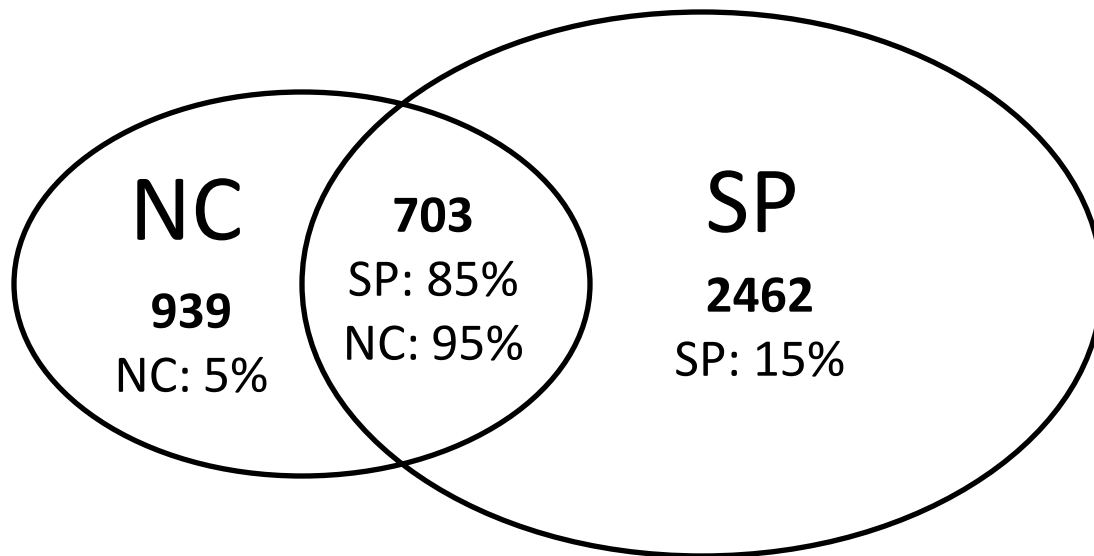

Figure S2. Venn diagram showing 97% OTU's (bold) and the percent of sequence reads shared between, and unique to newly-collected (NC) and stored pollen (SP).
